# Supplementary material for: The Key Genes Underlying Pathophysiology Association between Plaque Instability and Progression of Myocardial Infarction
Source: Hindawi journal article supplement (doi:10.1155/2021/4300406), 2021-12-09

A

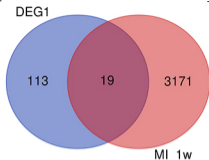

B

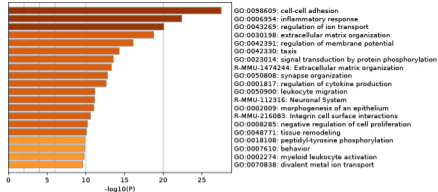

C

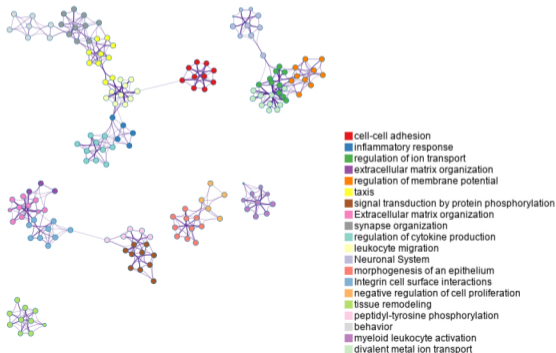

Supplement: f5 [file 4300406.f5.pdf]
